# Supplementary material for: Metamorphosis of the invasive ascidian Ciona savignyi: environmental variables and chemical exposure
Source: PeerJ. 2016 Feb 25;4:e1739. doi: 10.7717/peerj.1739 (PMC4782722; doi:10.7717/peerj.1739)
Supplement: Data S1 — Excel file with raw data for Ciona bioassay development. Each experiment is shown in a separate tab. Met Stage: stage of metamorphosis (A–F). [file peerj-04-1739-s001.xlsx]

## Sheet: Temperature
		Rep 1						Rep 2						Rep 3
15	Met Stage	A	B	C	D	E	F	A	B	C	D	E	F	A	B	C	D	E	F
	Day 1	5	12	12	0	0	0	2	5	30	0	0	0	0	9	19	0	0	0
	Day 3	0	0	0	35	0	0	0	0	0	44	0	0	0	0	1	36	0	0
	Day 5	0	0	0	0	26	8	0	0	0	0	38	10	0	0	0	0	28	11
	Day 7	0	0	0	1	3	31	0	0	0	0	5	40	0	0	0	1	3	37
18	Met Stage	A	B	C	D	E	F	A	B	C	D	E	F	A	B	C	D	E	F
	Day 1	1	9	19	0	0	0	0	6	27	0	0	0	3	3	21	0	0	0
	Day 3	0	0	4	24	0	0	0	0	0	44	0	0	0	0	5	25	0	0
	Day 5	0	0	0	0	10	19	0	0	0	0	12	30	0	0	0	2	10	30
	Day 7	0	0	0	1	3	30	0	0	0	0	1	40	0	0	0	1	1	38
21	Met Stage	A	B	C	D	E	F	A	B	C	D	E	F	A	B	C	D	E	F
	Day 1	2	11	20	0	0	0	0	0	42	0	0	0	3	6	20	0	0	0
	Day 3	0	0	9	21	0	0	0	0	2	44	0	0	0	0	1	23	0	0
	Day 5	0	0	0	0	12	26	0	0	0	0	10	31	0	0	0	0	8	20
	Day 7	0	0	0	1	2	38	0	0	0	0	0	40	0	0	0	0	4	28
25	Met Stage	A	B	C	D	E	F	A	B	C	D	E	F	A	B	C	D	E	F
	Day 1	5	0	11	0	0	0	6	0	0	0	0	0	0	0	4	0	0	0
	Day 3	0	0	0	11	0	0	0	0	0	0	0	0	0	0	0	9	0	0
	Day 5	0	0	0	9	0	1	0	0	0	0	0	0	0	0	0	1	0	8
	Day 7	0	0	0	0	6	1	0	0	0	0	0	0	0	0	0	1	2	8

## Sheet: Lighting
		Rep 1						Rep 2						Rep 3
Intense Light	Met Stage	A	B	C	D	E	F	A	B	C	D	E	F	A	B	C	D	E	F
	Day 1	0	0	36	0	0	0	2	5	32	0	0	0	1	3	42	0	0	0
	Day 3	0	0	0	24	0	0	0	0	2	30	0	0	0	0	4	40	0	0
	Day 5	0	0	0	0	20	7	0	0	0	2	21	5	0	0	0	3	33	1
	Day 7	0	0	0	0	7	20	0	0	0	0	5	22	0	0	0	0	5	30
12 h Intense Light	Met Stage	A	B	C	D	E	F	A	B	C	D	E	F	A	B	C	D	E	F
	Day 1	1	0	32	0	0	0	0	3	13	0	0	0	0	0	21	0	0	0
	Day 3	0	0	8	14	0	0	0	0	0	12	0	0	0	0	2	20	0	0
	Day 5	0	0	0	3	20	6	0	0	0	0	6	6	0	0	0	0	15	5
	Day 7	0	0	0	0	2	27	0	0	0	0	0	12	0	0	0	0	0	20
Subdued Light	Met Stage	A	B	C	D	E	F	A	B	C	D	E	F	A	B	C	D	E	F
	Day 1	1	2	40	0	0	0	2	2	32	0	0	0	1	6	26	0	0	0
	Day 3	0	0	0	32	0	0	0	0	2	24	0	0	0	0	6	26	0	0
	Day 5	0	0	0	0	27	3	0	0	0	0	28	7	0	0	0	0	24	8
	Day 7	0	0	0	0	1	30	0	0	0	0	7	31	0	0	0	0	5	32
12h Subdued Light	Met Stage	A	B	C	D	E	F	A	B	C	D	E	F	A	B	C	D	E	F
	Day 1	1	1	38	0	0	0	0	0	41	0	0	0	0	2	42	0	0	0
	Day 3	0	0	2	40	0	0	0	0	2	40	0	0	0	0	0	46	0	0
	Day 5	0	0	0	0	40	7	0	0	0	0	40	10	0	0	0	0	41	9
	Day 7	0	0	0	0	2	48	0	0	0	0	4	50	0	0	0	0	6	42
Full Dark	Met Stage	A	B	C	D	E	F	A	B	C	D	E	F	A	B	C	D	E	F
	Day 1	0	0	27	0	0	0	0	1	31	0	0	0	1	2	34	0	0	0
	Day 3	0	0	0	27	0	0	0	0	0	30	0	0	0	0	3	32	0	0
	Day 5	0	0	0	0	20	7	0	0	0	0	23	2	0	0	0	0	23	6
	Day 7	0	0	0	0	2	26	0	0	0	0	4	21	0	0	0	0	1	28

## Sheet: Substrate
		Rep 1						Rep 2						Rep 3
Polystyrene Smooth	Met Stage	A	B	C	D	E	F	A	B	C	D	E	F	A	B	C	D	E	F
	Day 1	2	2	15	0	0	0	0	0	27	0	0	0	6	6	16	0	0	0
	Day 3	0	0	0	28	0	0	0	0	0	33	0	0	0	0	0	29	0	0
	Day 5	0	0	0	0	19	12	0	0	0	0	20	15	0	0	0	0	30	11
	Day 7	0	0	0	0	7	32	0	0	0	0	3	32	0	0	0	0	2	40
Polystyrene Rough	Met Stage	A	B	C	D	E	F	A	B	C	D	E	F	A	B	C	D	E	F
	Day 1	0	0	51	0	0	0	2	0	28	0	0	0	2	2	40	0	0	0
	Day 3	0	0	0	49	0	0	0	0	0	39	0	0	0	0	0	41	0	0
	Day 5	0	0	0	0	30	12	0	0	0	3	32	9	0	0	0	0	27	4
	Day 7	0	0	0	0	0	43	0	0	0	0	8	40	0	0	0	0	0	30
Glass Smooth	Met Stage	A	B	C	D	E	F	A	B	C	D	E	F	A	B	C	D	E	F
	Day 1	2	5	12	0	0	0	0	3	50	0	0	0	1	5	31	0	0	0
	Day 3	0	0	0	22	0	0	0	0	0	44	0	0	0	0	3	35	0	0
	Day 5	0	0	0	0	29	1	0	0	0	0	40	4	0	0	0	0	30	11
	Day 7	0	0	0	0	2	25	0	0	0	0	1	41	0	0	0	0	3	38
Glass Rough	Met Stage	A	B	C	D	E	F	A	B	C	D	E	F	A	B	C	D	E	F
	Day 1	0	0	31	0	0	0	0	2	26	0	0	0	5	0	41	0	0	0
	Day 3	0	0	0	28	0	0	0	0	0	24	0	0	0	0	0	38	0	0
	Day 5	0	0	0	0	20	8	0	0	0	0	20	7	0	0	0	0	29	6
	Day 7	0	0	0	0	7	20	0	0	0	0	6	22	0	0	0	0	3	38
Acrylic Smooth	Met Stage	A	B	C	D	E	F	A	B	C	D	E	F	A	B	C	D	E	F
	Day 1	2	0	29	0	0	0	0	5	11	0	0	0	1	0	29	0	0	0
	Day 3	0	0	0	27	0	0	0	0	0	16	0	0	0	0	3	29	0	0
	Day 5	0	0	0	0	14	9	0	0	0	0	11	7	0	0	0	0	20	2
	Day 7	0	0	0	0	5	22	0	0	0	0	1	19	0	0	0	0	2	19
Acrylic Rough	Met Stage	A	B	C	D	E	F	A	B	C	D	E	F	A	B	C	D	E	F
	Day 1	2	3	21	0	0	0	1	0	44	0	0	0	3	2	25	0	0	0
	Day 3	0	0	0	22	0	0	0	0	0	45	0	0	0	0	0	35	0	0
	Day 5	0	0	0	0	19	9	0	0	0	0	29	6	0	0	0	0	29	5
	Day 7	0	0	0	0	2	28	0	0	0	0	0	40	0	0	0	0	4	28

## Sheet: Density + Vessel Size
Raw Data		Rep 1						Rep 2						Rep 3
Petri 2.5 Larvae/mL	Met stage	A	B	C	D	E	F	A	B	C	D	E	F	A	B	C	D	E	F
	Day 1	2	0	3	0	0	0	1	0	4	0	0	0	0	0	2	0	0	0
	Day 3	0	0	0	5	0	0	0	0	0	7	0	0	0	0	0	2	0	0
	Day 5	0	0	0	0	0	0	0	0	0	0	8	1	0	0	0	0	2	0
	Day 7	0	0	0	0	1	4	0	0	0	0	2	7	0	0	0	0	0	2
Petri 5 Larvae/mL	Met stage	A	B	C	D	E	F	A	B	C	D	E	F	A	B	C	D	E	F
	Day 1	0	6	26	0	0	0	1	5	45	0	0	0	0	5	22	0	0	0
	Day 3	0	0	0	29	0	0	0	0	0	44	0	0	0	0	0	46	0	0
	Day 5	0	0	0	0	32	0	0	0	0	0	31	2	0	0	0	0	42	0
	Day 7	0	0	0	0	1	31	0	0	0	0	6	28	0	0	0	0	5	44
Petri 10 Larvae/mL	Met stage	A	B	C	D	E	F	A	B	C	D	E	F	A	B	C	D	E	F
	Day 1	0	4	142	0	0	0	4	25	167	0	0	0	0	7	164	0	0	0
	Day 3	0	0	0	144	0	0	0	0	0	165	0	0	0	4	0	158	0	0
	Day 5	0	0	0	0	132	1	0	0	0	0	122	29	0	0	0	0	147	9
	Day 7	0	0	0	0	11	126	0	0	0	0	2	144	0	0	0	0	21	151
Petri 15 Larvae/mL	Met stage	A	B	C	D	E	F	A	B	C	D	E	F	A	B	C	D	E	F
	Day 1	0	11	242	0	0	0	6	5	301	0	0	0	2	11	134	0	0	0
	Day 3	0	0	0	341	0	0	0	0	0	207	0	0	0	0	0	105	0	0
	Day 5	0	0	0	0	294	14	0	0	0	0	198	24	0	0	0	0	111	11
	Day 7	0	0	0	0	11	301	0	0	0	0	34	214	0	0	0	0	2	122
6-well 2.5 Larvae/mL	Met stage	A	B	C	D	E	F	A	B	C	D	E	F	A	B	C	D	E	F
	Day 1	2	0	4	0	0	0	0	2	2	0	0	0	0	0	4	0	0	0
	Day 3	0	0	0	4	0	0	0	0	3	3	0	0	0	0	4	3	0	0
	Day 5	0	0	0	0	2	0	0	0	0	0	2	3	0	0	0	0	4	2
	Day 7	0	0	0	0	0	2	0	0	0	0	1	4	0	0	0	0	2	4
6-well 5 Larvae/mL	Met stage	A	B	C	D	E	F	A	B	C	D	E	F	A	B	C	D	E	F
	Day 1	1	0	9	0	0	0	1	0	17	0	0	0	0	3	6	0	0	0
	Day 3	0	0	0	29	0	0	0	0	0	21	0	0	0	0	0	19	0	0
	Day 5	0	0	0	0	23	7	0	0	0	0	20	3	0	0	0	0	21	6
	Day 7	0	0	0	0	1	30	0	0	0	0	2	24	0	0	0	0	7	22
6-well 10 Larvae/mL	Met stage	A	B	C	D	E	F	A	B	C	D	E	F	A	B	C	D	E	F
	Day 1	3	1	11	0	0	0	0	2	15	0	0	0	0	6	23	0	0	0
	Day 3	0	0	0	48	0	0	0	0	2	65	0	0	0	0	0	32	0	0
	Day 5	0	0	0	0	51	6	0	0	0	0	66	9	0	0	0	0	21	6
	Day 7	0	0	0	0	6	60	0	0	0	0	2	70	0	0	0	0	2	40
6-well 15 Larvae/mL	Met stage	A	B	C	D	E	F	A	B	C	D	E	F	A	B	C	D	E	F
	Day 1	0	2	25	0	0	0	0	15	44	0	0	0	0	14	29	0	0	0
	Day 3	0	2	0	72	0	0	0	0	0	94	0	0	0	0	4	66	0	0
	Day 5	0	0	0	0	99	4	0	0	0	0	90	10	0	0	0	0	78	3
	Day 7	0	0	0	0	15	87	0	0	0	0	6	100	0	0	0	0	13	80
12-well 2.5 Larvae/mL	Met stage	A	B	C	D	E	F	A	B	C	D	E	F	A	B	C	D	E	F
	Day 1	0	0	2	0	0	0	0	0	2	0	0	0	0	0	2	0	0	0
	Day 3	0	0	0	1	0	0	0	0	0	7	0	0	0	0	0	6	0	0
	Day 5	0	0	0	0	1	0	0	0	0	0	4	4	0	0	0	0	5	1
	Day 7	0	0	0	0	0	1	0	0	0	0	0	8	0	0	0	0	1	5
12-well 5 Larvae/mL	Met stage	A	B	C	D	E	F	A	B	C	D	E	F	A	B	C	D	E	F
	Day 1	1	6	1	0	0	0	1	2	6	0	0	0	0	0	4	0	0	0
	Day 3	0	0	0	15	0	0	0	0	0	24	0	0	0	0	0	21	0	0
	Day 5	0	0	0	0	14	1	0	0	0	0	21	3	0	0	0	0	21	0
	Day 7	0	0	0	0	2	13	0	0	0	0	2	22	0	0	0	0	1	19
12-well 10 Larvae/mL	Met stage	A	B	C	D	E	F	A	B	C	D	E	F	A	B	C	D	E	F
	Day 1	0	2	19	0	0	0	2	0	31	0	0	0	2	1	29	0	0	0
	Day 3	0	0	0	26	0	0	0	0	0	44	0	0	0	0	0	32	0	0
	Day 5	0	0	0	0	32	2	0	0	0	0	30	12	0	0	0	0	31	1
	Day 7	0	0	0	0	8	32	0	0	0	0	0	41	0	0	0	0	2	30
12-well 15 Larvae/mL	Met stage	A	B	C	D	E	F	A	B	C	D	E	F	A	B	C	D	E	F
	Day 1	0	5	67	0	0	0	1	0	19	0	0	0	3	0	58	0	0	0
	Day 3	0	0	0	71	0	0	0	0	0	59	0	0	0	0	0	61	0	0
	Day 5	0	0	0	0	44	12	0	0	0	0	54	8	0	0	0	0	55	7
	Day 7	0	0	0	0	3	60	0	0	0	0	2	60	0	0	0	0	5	60

## Sheet: Fill Volume
	Stage E larvae
	Rep 1	Rep 2	Rep 3
Filled to capacity	56	60	67
Control	20	18	29

## Sheet: Solvent
		Stage E larvae
		Rep 1	Rep 2	Rep 3
	Control	32	30	34
Ethanol (ul/mL)	0.05	25	25	37
	0.1	25	30	36
	0.25	32	28	29
	0.5	29	29	21
	1	24	27	32
	2.5	27	31	30
	5	31	34	35
	10	23	21	34
	20	22	21	11
	40	0	0	0
DMSO (ul/mL)	0.05	24	32	29
	0.1	32	28	30
	0.25	25	28	31
	0.5	32	41	39
	1	37	29	36
	2.5	36	33	41
	5	29	41	28
	10	14	24	22
	20	29	19	31
	40	0	0	0

## Sheet: Reference Compounds
		Stage E larvae
		Rep 1	Rep 2	Rep 3
Control		47	52	42
Polygodial (ng/mL)	1	35	44	42
	2.5	17	22	24
	5	10	25	34
	10	22	24	27
	15	17	11	18
	20	6	4	9
	40	0	0	0
	80	0	0	0
Portimine (ng/mL)	0.05	38	32	31
	0.1	36	38	30
	0.5	35	34	28
	1	18	15	22
	5	1	3	1
	10	0	0	0
	20	0	0	0
Chlorothalonil (ug/mL)	0.001	40	31	39
	0.005	39	34	40
	0.01	30	54	34
	0.1	31	25	22
	1	0	0	0
	5	0	0	0
	10	0	0	0
Oroidin (ug/mL)	0.001	42	49	38
	0.005	40	52	47
	0.01	46	49	38
	0.1	34	53	47
	1	31	34	40
	5	5	0	3
	10	0	0	0
Totylfluanid (ug/mL)	0.001	51	52	52
	0.005	45	52	42
	0.01	48	31	43
	0.1	52	31	40
	1	11	7	13
	5	0	0	0
	10	0	0	0

## Sheet: POlygodial controls
	Stage E larvae
PG (ng/mL)	Rep 1	Rep 2	Rep 3
0	40	48	38
5	36	14	18
10	18	21	19
50	0	0	0
0	44	51	29
5	30	15	30
10	24	15	16
50	0	0	0
0	32	44	38
5	18	20	30
10	16	14	15
50	0	0	0
0	40	40	40
5	10	25	34
10	22	24	27
50	0	0	0
0	41	58	51
5	24	32	36
10	28	18	21
50	0	0	0
0	38	35	32
5	17	18	21
10	11	13	19
50	0	0	0
0	29	60	41
5	30	30	31
10	29	11	20
50	0	0	0
0	49	44	48
5	32	28	21
10	21	40	20
50	0	0	0

## Sheet: Enriched vs Pure Polygodial
		Stage E larvae
		Rep 1	Rep 2	Rep 3
Polygodial (ng/mL)	0	47	41	40
	2.5	27	21	32
	5	6	5	10
	10	0	1	2
	50	0	0	0
Enriched Polygodial (ng/mL)	0	57	44	28
	2.5	35	31	31
	5	30	15	30
	10	14	15	16
	50	0	0	0
